# Supplementary material for: A polypyrrole-coated eightfold-helical Wells–Dawson POM-based Cu-FKZ framework for enhanced colorimetric sensing
Source: Royal Society of Chemistry journal article supplement (doi:10.1039/d0an00402b), 2020-01-01
Supplement: d0an00402b1.pdf [file d0an00402b1.pdf]

## Supporting Information

### **Polypyrrole Coating Eightfold Helical Wells-Dawson POMs based Cu-FKZ Framework for Boosting Colorimetric Sensing**

Qian Li,<sup>a,b</sup> Mingqi Xu,<sup>a,b</sup> Xiao Li,<sup>a</sup> Shuxian Li,<sup>b</sup> Liran Hou,<sup>a</sup> Yuhao Chen,<sup>a</sup> Jingquan  
Sha<sup>\*a,b</sup>

<sup>a</sup>Department of Chemistry and Chemical Engineering, Jining University, Qufu  
273155, P. R. China.

<sup>b</sup>School of Pharmacy, Jiamusi University, HeilongJiang, Jiamusi,  
Heilongjiang,154007, P.R. China.

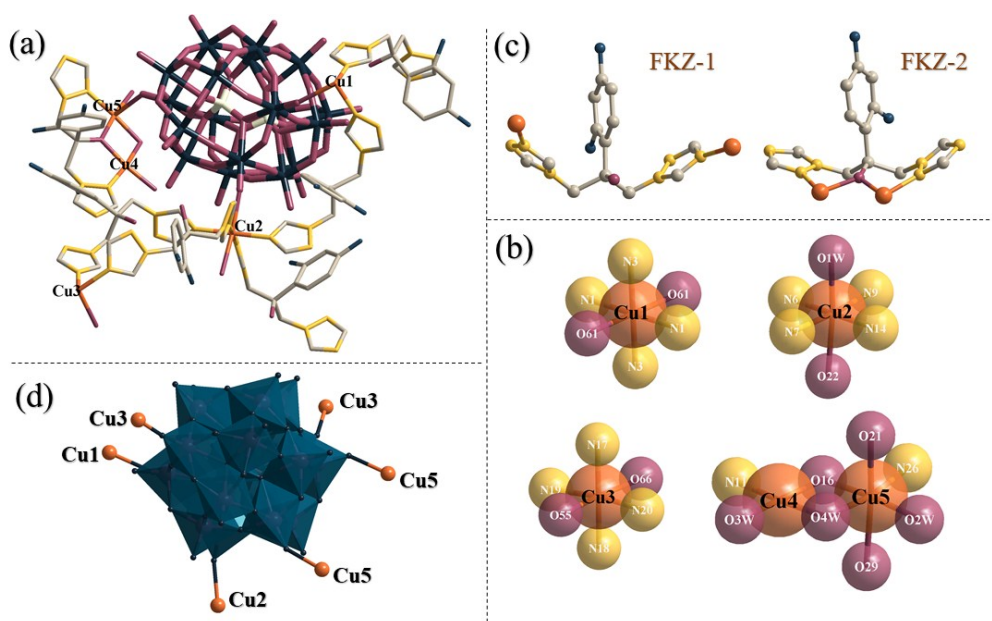

**Fig. S1** (a) Combined wires/sticks representation of the asymmetric unit of CuFKZP<sub>2</sub>W<sub>18</sub>. All the hydrogen atoms and free water molecules have been omitted for clarity; The coordination modes of Cu ions (b) Cu1, Cu2, Cu3, and Cu5 adopt hexadentate coordination modes, and Cu4 adopts tetradentate coordination modes, which are completed by four N from four FKZ-1 and two O from two P<sub>2</sub>W<sub>18</sub>, four N from four FKZ-1 with two O from one P<sub>2</sub>W<sub>18</sub> and one H<sub>2</sub>O, four N from four FKZ and two O from two P<sub>2</sub>W<sub>18</sub>, one N from one FKZ with five O from two P<sub>2</sub>W<sub>18</sub>, two H<sub>2</sub>O and one FKZ, one N from one FKZ and three O from one FKZ and two H<sub>2</sub>O, respectively; (c and d) The coordination modes of the FKZ ligand (c), P<sub>2</sub>W<sub>18</sub> polyanions (d).

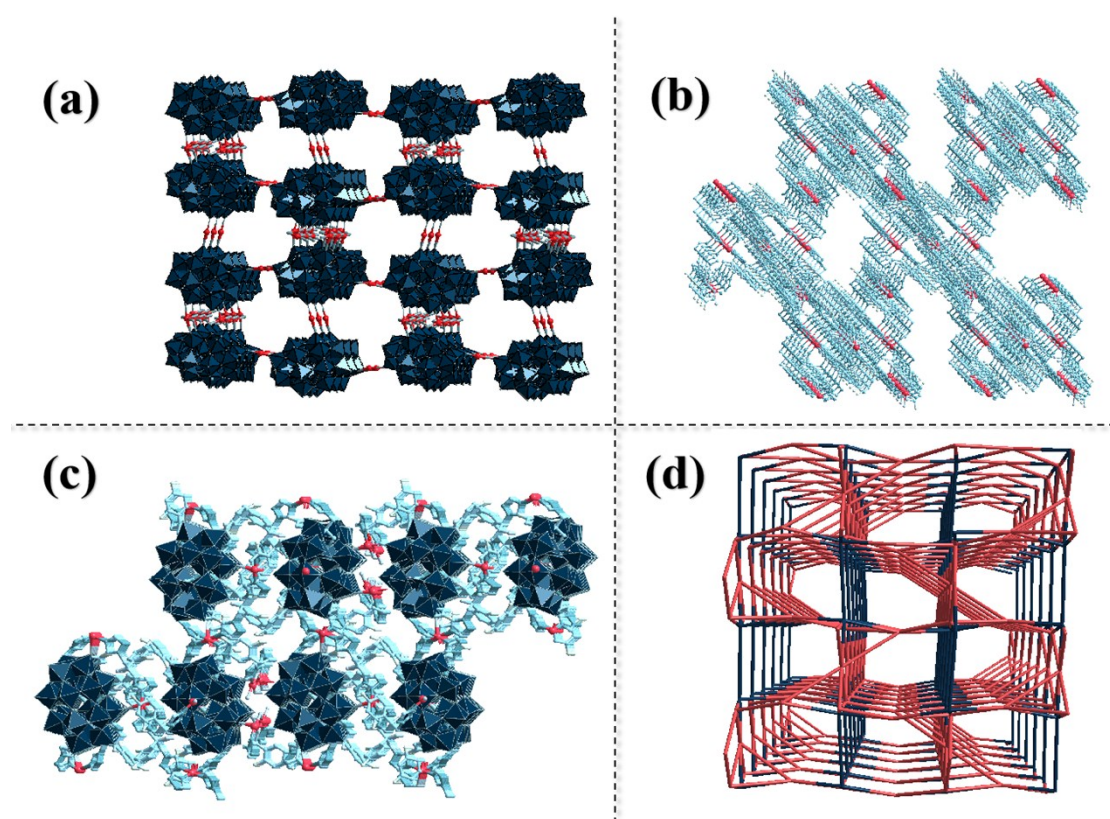

**Fig. S2** (a) Ball/stick/polyhedral representation of three-dimensional inorganic backbone containing Type-I meso-helices. (b) Ball/stick representation of three-dimensional inorganic backbone containing Type-II meso-helices. (c) Ball/stick/polyhedral representation of whole three-dimensional framework of  $\text{CuFKZP}_2\text{W}_{18}$  containing Type-I and Type-II meso-helices and FKZ-2. (d) The topology of  $\text{Cu}(\text{FKZ})\text{P}_2\text{W}_{18}$  along  $a$  axis. The dark blue nodes represent  $\text{P}_2\text{W}_{18}$  polyanions, and the burnt-orange nodes symbolize  $\text{Cu}^{2+}$  ions.

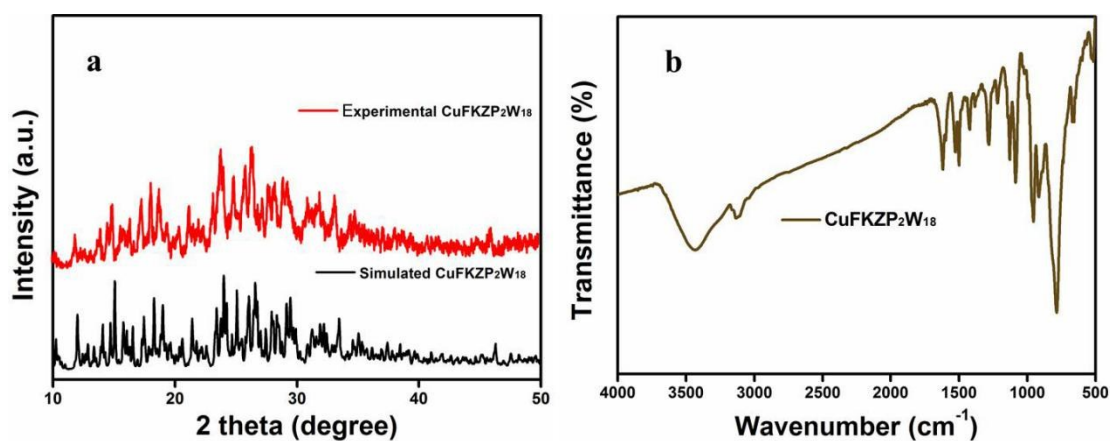

**Fig. S3** PXRD patterns (a) and IR spectra (b) of  $\text{CuFKZP}_2\text{W}_{18}$ .

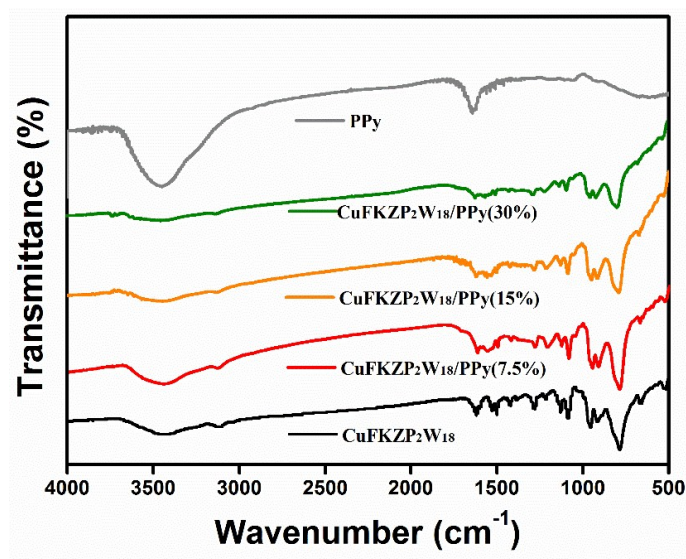

**Fig. S4** IR spectra of PPy,  $\text{CuFKZP}_2\text{W}_{18}$  and  $\text{CuFKZP}_2\text{W}_{18}/\text{PPy}(n)$ .

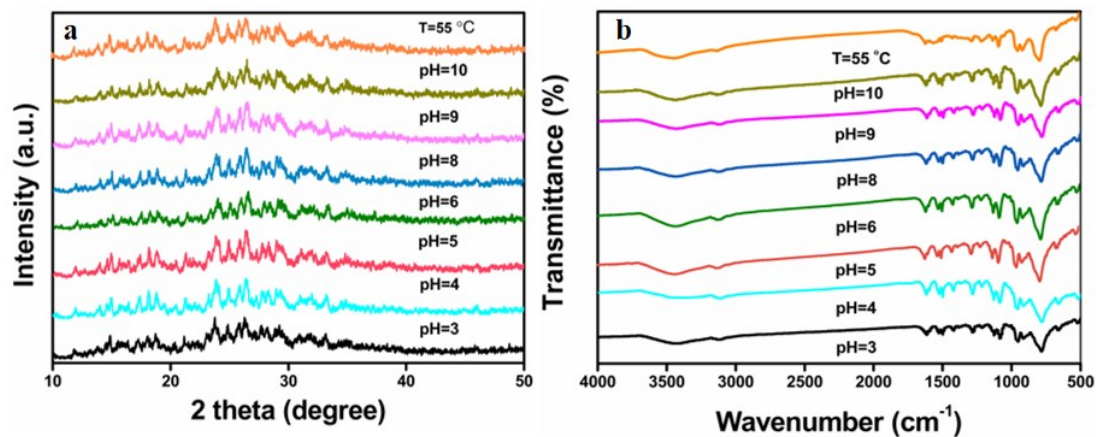

Fig. S5 PXRD patterns (a) and IR spectra (b) of  $\text{CuFKZP}_2\text{W}_{18}$  soaked in aqueous solution with different pH values at room temperature for 12 h and treated at  $55^\circ\text{C}$  for 12 h.

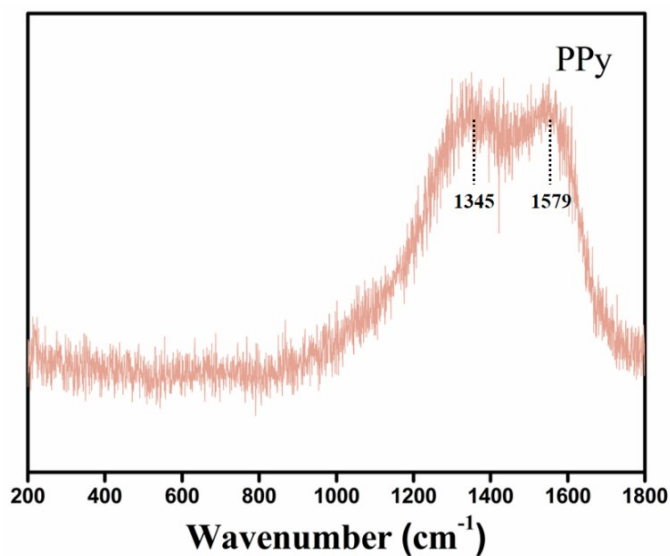

Fig. S6 Raman spectra of PPy.

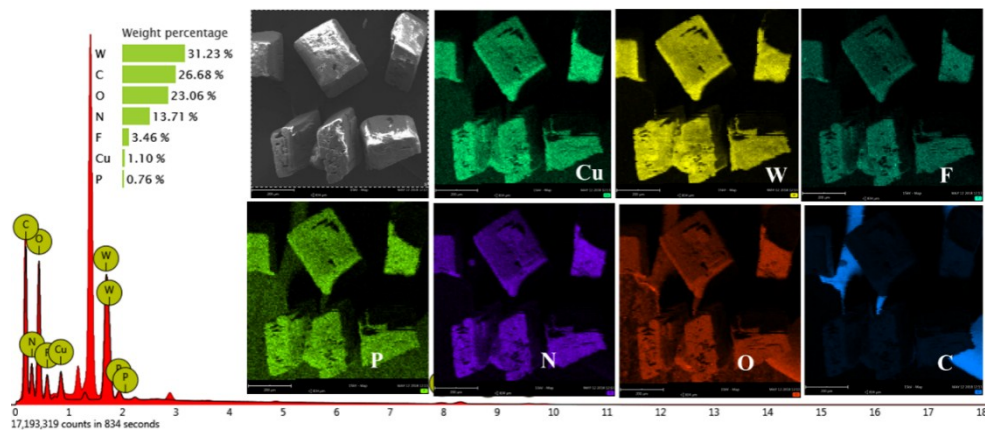

Fig. S7 The corresponding mapping images of C, O, W, P, F, Cu, and N in  $\text{CuFKZP}_2\text{W}_{18}$ .

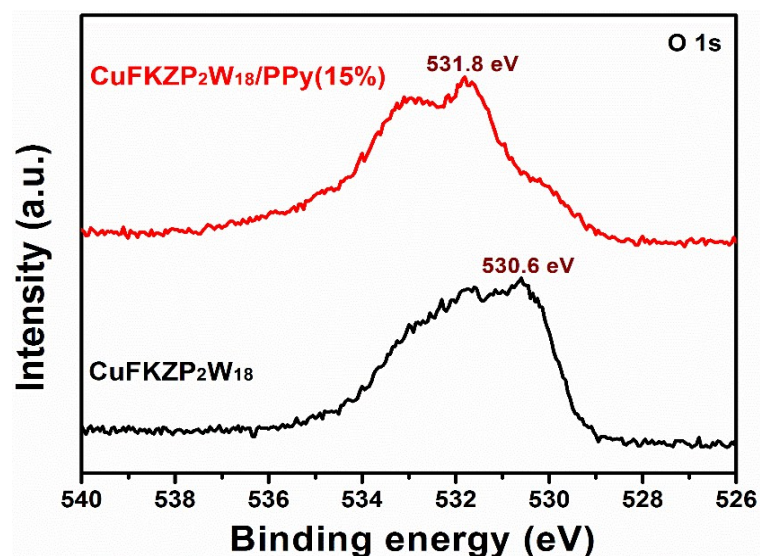

Fig. S8. The O 1s XPS spectra of CuFKZP<sub>2</sub>W<sub>18</sub> and CuFKZP<sub>2</sub>W<sub>18</sub>/PPy(15%).

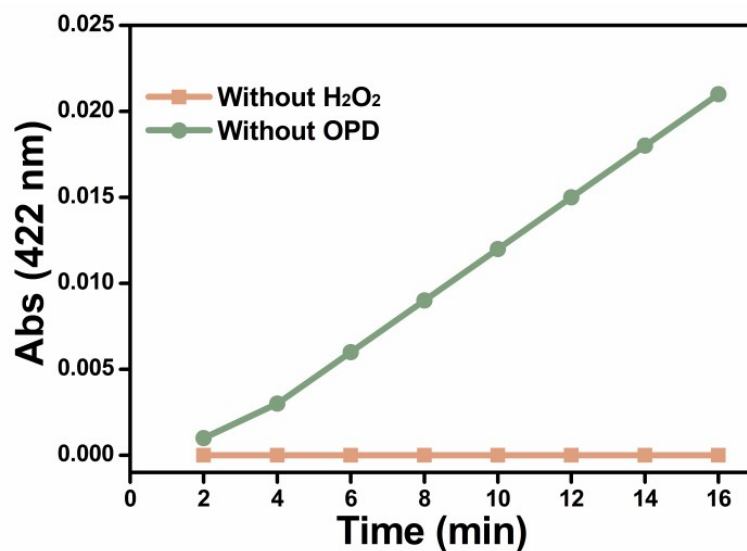

Fig. S9 Time-dependent absorbance of CuFKZP<sub>2</sub>W<sub>18</sub> (0.6 mg/mL) in the absence of H<sub>2</sub>O<sub>2</sub> or OPD. Typical reaction conditions: acetate buffer solution (pH=7), H<sub>2</sub>O<sub>2</sub> 100  $\mu$ M, OPD 30  $\mu$ M and 4 min at 40°C.

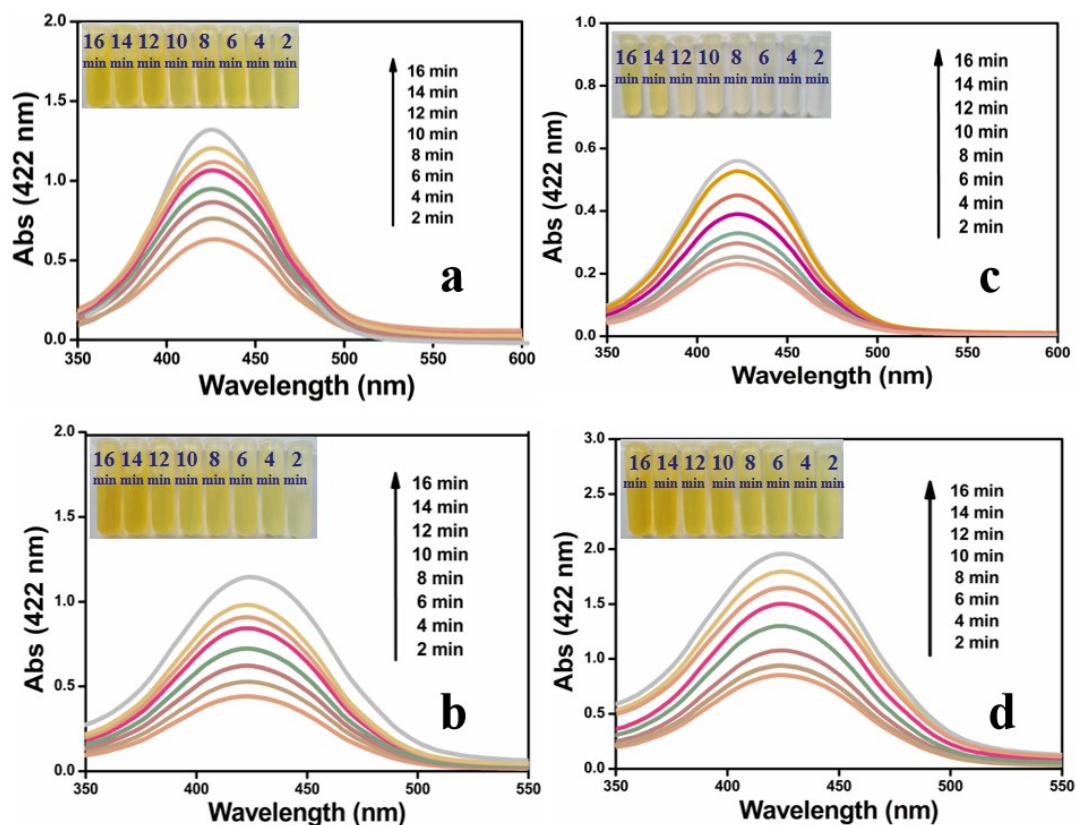

**Fig. S10** UV-vis absorption spectra of CuFKZP<sub>2</sub>W<sub>18</sub> (a), CuFKZP<sub>2</sub>W<sub>18</sub>/PPy(7%) (b), PPy (c) and CuFKZP<sub>2</sub>W<sub>18</sub>/PPy(30%) (d) catalyzed OPD colorimetric system as a function of reaction time from 2 to 16 min. Typical reaction conditions: CuFKZP<sub>2</sub>W<sub>18</sub>/PPy(n%) (0.6 mg/mL), acetate buffer solution (pH=7), H<sub>2</sub>O<sub>2</sub> 100  $\mu$ M, OPD 30  $\mu$ M at 40 °C.

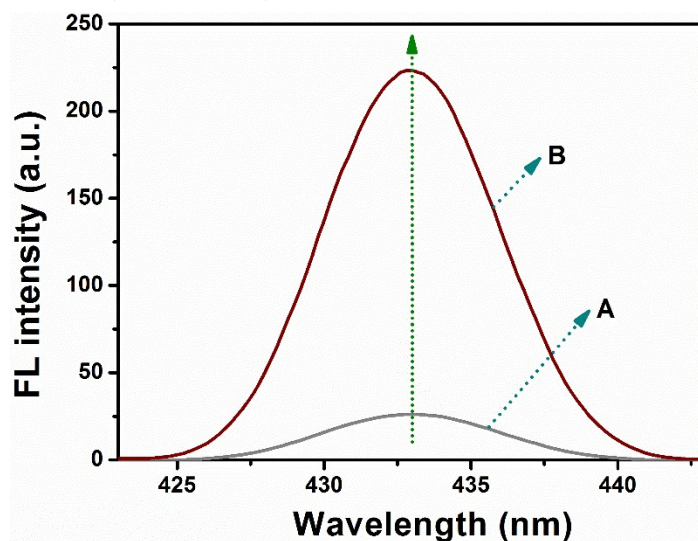

**Fig. S11** The corresponding fluorescence spectra of TA solution ( $2 \times 10^{-3}$  M) in the absence (A) and presence (B) of CuFKZP<sub>2</sub>W<sub>18</sub>/PPy(15%) with H<sub>2</sub>O<sub>2</sub> (50 mM) during photoluminescence probing, respectively.

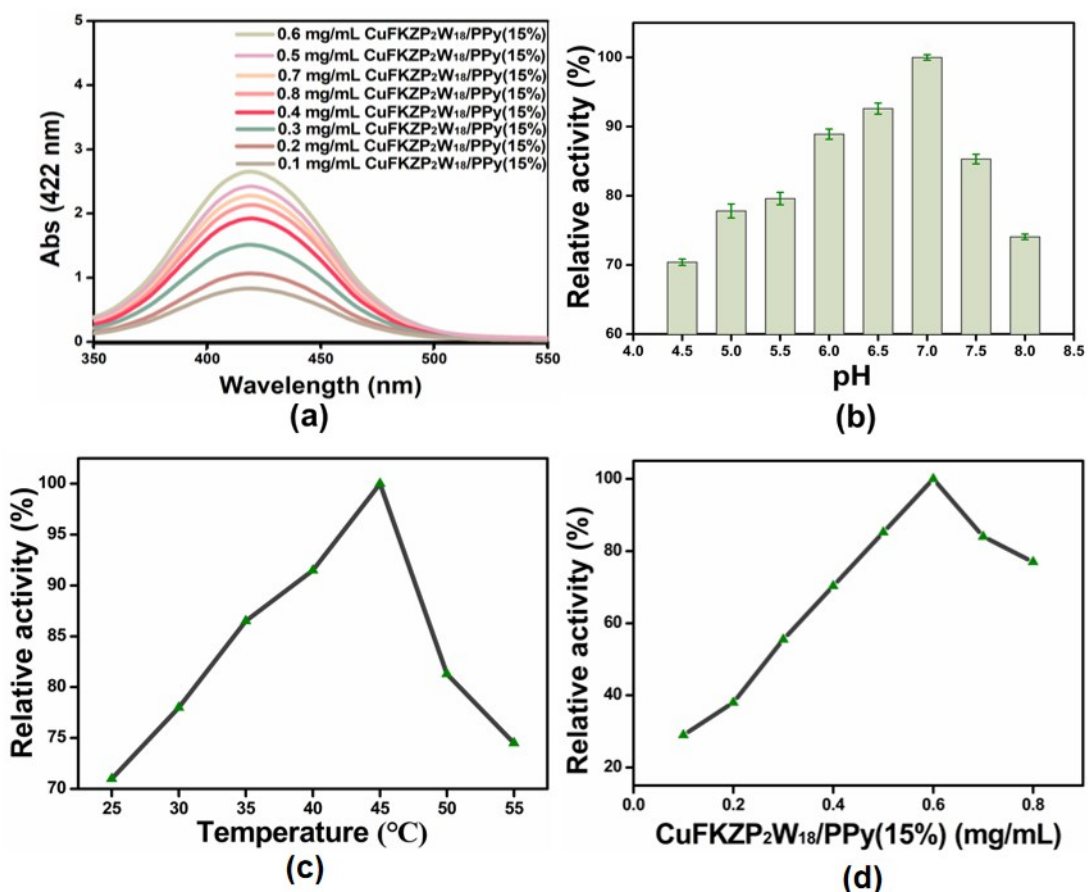

**Fig. S12** UV-vis absorption spectra of CuFKZP<sub>2</sub>W<sub>18</sub>/PPy(15%) catalyzed OPD colorimetric system as a function of CuFKZP<sub>2</sub>W<sub>18</sub>/PPy(15%) dosage (a), reaction acidity (b) and reaction temperature (c). (d) Dependence of the peroxidase-like activity on CuFKZP<sub>2</sub>W<sub>18</sub>/PPy(15%) dosage (dosage: 0.1, 0.2, 0.3, 0.4, 0.5, 0.6, 0.7, 0.8 mg/mL). Typical reaction conditions: H<sub>2</sub>O<sub>2</sub> 100  $\mu$ M, OPD 30  $\mu$ M, time 4 min and temperature 40 °C.

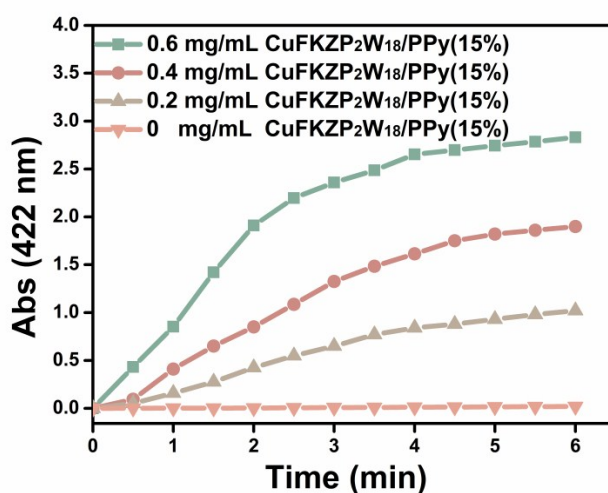

**Fig. S13** Time-dependent absorbance changes at 422 nm in the presence of 0 mg/mL, 0.2 mg/mL, 0.4 mg/mL, and 0.6 mg/mL CuFKZP<sub>2</sub>W<sub>18</sub>/PPy(15%) in buffer solution (pH 7.0). Typical reaction conditions: H<sub>2</sub>O<sub>2</sub> 100  $\mu$ M, OPD 30  $\mu$ M, time 4 min and temperature 40 °C.

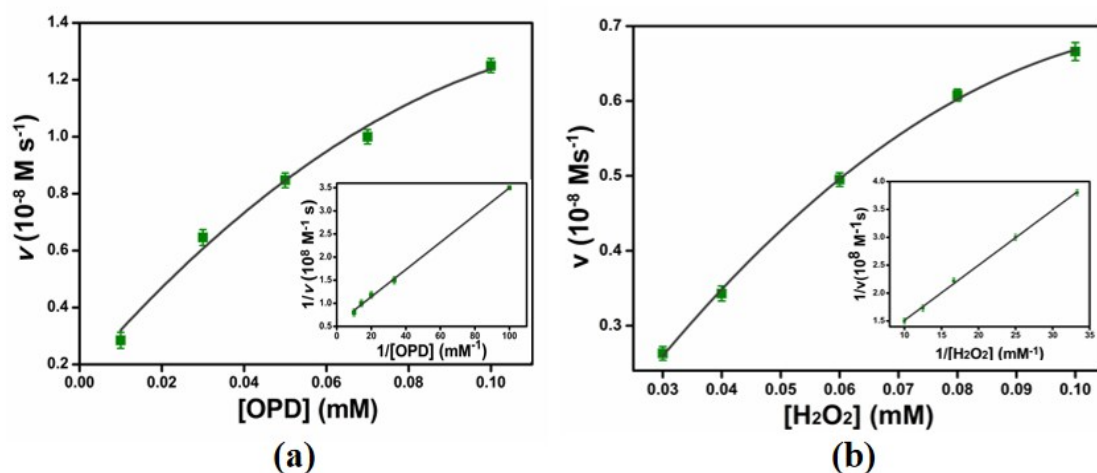

**Fig. S14** Steady-state kinetic assays of CuFKZP<sub>2</sub>W<sub>18</sub> (0.6 mg/mL): (a) 100  $\mu\text{M}$  H<sub>2</sub>O<sub>2</sub> with varying OPD concentration, (b) 30  $\mu\text{M}$  OPD with varying H<sub>2</sub>O<sub>2</sub> concentration. The reaction was performed in pH=7.0 buffer solution, time 4 min and temperature 40 °C.

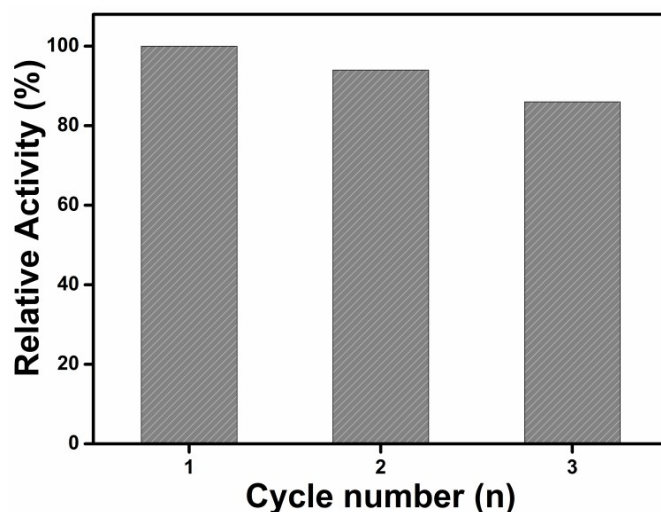

**Fig. S15** Reusability of CuFKZP<sub>2</sub>W<sub>18</sub>/PPy(15%) (0.6 mg/mL) after repeated cycles. Typical reaction conditions: acetate buffer solution (pH=7), H<sub>2</sub>O<sub>2</sub> 100  $\mu\text{M}$ , OPD 30  $\mu\text{M}$ , time 4 min and temperature 40 °C.

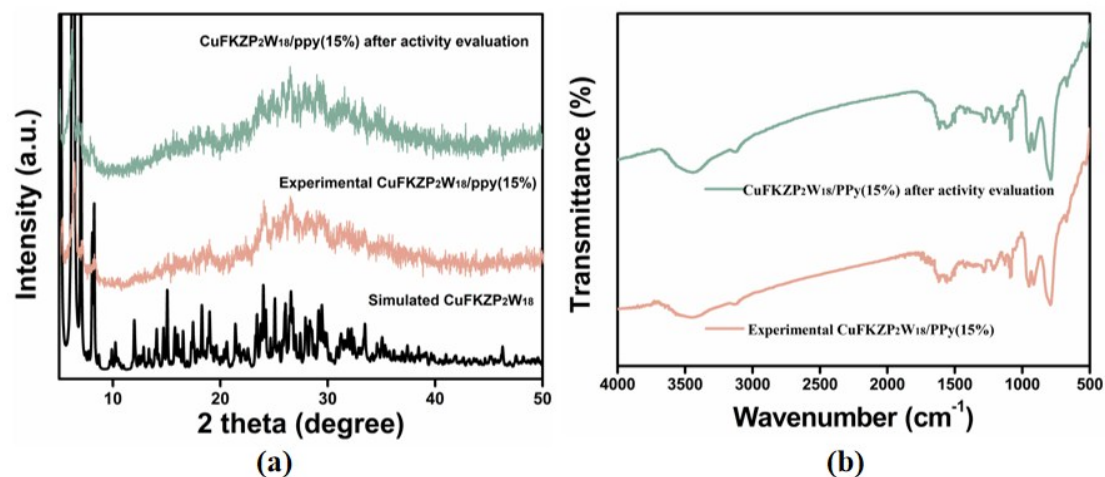



**Fig. S16** (a) PXRD patterns of simulated CuFKZP<sub>2</sub>W<sub>18</sub> and CuFKZP<sub>2</sub>W<sub>18</sub>/PPy(15%) before and after peroxidase-like activity evaluation. (b) IR spectra of experimental CuFKZP<sub>2</sub>W<sub>18</sub>/PPy(15%) and CuFKZP<sub>2</sub>W<sub>18</sub>/PPy(15%) after activity evaluation.

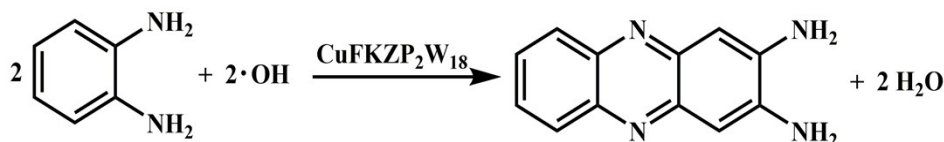

**Scheme S1.** The oxidation reaction of OPD catalyzed by CuFKZP<sub>2</sub>W<sub>18</sub> in the presence of H<sub>2</sub>O<sub>2</sub>.

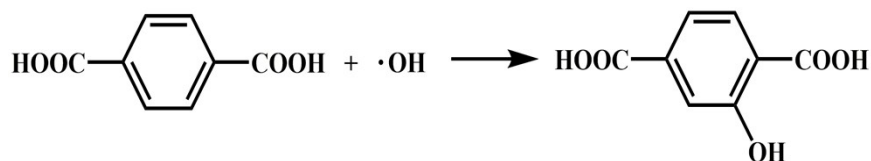

**Non-fluorescence**

**High fluorescence**

**Scheme S2.** Hydroxyl radicals ( $\cdot\text{OH}$ ) induced the conversion of non-fluorescent terephthalic acid to highly fluorescent 2-hydroxyterephthalic acid.

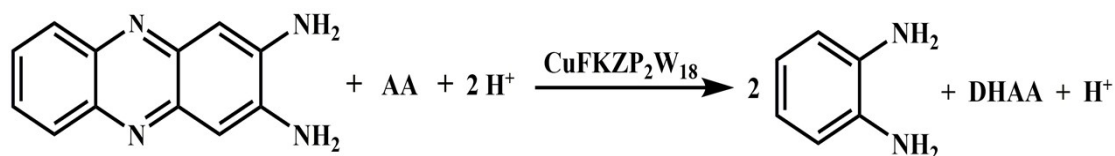

**Scheme S3.** AA induced the conversion of oxOPD to OPD.

**Table S1.** The BVS calculations of W and Cu atoms in CuFKZP<sub>2</sub>W<sub>18</sub> (BL= bond length, BV= bond valence).

|           |                |                |                 |                 |                |                |  |
|-----------|----------------|----------------|-----------------|-----------------|----------------|----------------|--|
| BL for W1 | 1.713<br>(O29) | 1.866<br>(O30) | 1.927<br>(O40)  | 1.867<br>(O45)  | 1.935<br>(O47) | 2.317<br>(O59) |  |
| BL for W2 | 1.898<br>(O2)  | 2.356<br>(O16) | 1.911<br>(O19)  | 1.887<br>(O20)  | 1.875<br>(O32) | 1.714<br>(O61) |  |
| BL for W3 | 2.311<br>(O6)  | 1.894<br>(O8)  | 1.933<br>(O20)  | 1.704<br>(O22)  | 1.948<br>(O23) | 1.855<br>(O31) |  |
| BL for W4 | 1.697<br>(O1)  | 1.881<br>(O2)  | 2.334<br>(O3)   | 1.906<br>(O10)  | 1.893<br>(O18) | 1.933<br>(O33) |  |
| BL for W5 | 2.517<br>(O6)  | 1.874<br>(O8)  | 1.926<br>(O10)  | 1.883<br>(O15)  | 1.658<br>(O16) | 1.894<br>(O23) |  |
| BL for W6 | 2.369<br>(O9)  | 1.913<br>(O15) | 1.868<br>(O23)  | 1.709<br>(O24)  | 1.901<br>(O25) | 1.908<br>(O27) |  |
| BL for W7 | 1.917<br>(O35) | 1.914<br>(O40) | 1.876<br>(O48)  | 1.912<br>(O54)  | 2.349<br>(O59) | 1.690<br>(O60) |  |
| BL for W8 | 2.342<br>(O5)  | 1.879<br>(O12) | 1.905<br>(O0AA) | 1.924<br>(O1AA) | 1.713<br>(O21) | 1.900<br>(O35) |  |
| BL for W9 | 1.940<br>(O31) | 2.376<br>(O36) | 1.926<br>(O42)  | 1.889<br>(O43)  | 1.699<br>(O44) | 1.904<br>(O45) |  |

|            |                |                 |                 |                 |                 |                |                |
|------------|----------------|-----------------|-----------------|-----------------|-----------------|----------------|----------------|
| BL for W10 | 2.367<br>(O5)  | 1.878<br>(O8)   | 1.919<br>(O0AA) | 1.693<br>(O14)  | 1.881<br>(O15)  | 1.953<br>(O30) |                |
| BL for W11 | 1.688<br>(O4)  | 1.912<br>(O32)  | 2.377<br>(O36)  | 1.899<br>(O41)  | 1.905<br>(O42)  | 1.909<br>(O46) |                |
| BL for W12 | 2.409<br>(O9)  | 1.910<br>(O18)  | 1.895<br>(O19)  | 1.926<br>(O25)  | 1.665<br>(O26)  | 1.906<br>(O28) |                |
| BL for W13 | 1.693<br>(O7)  | 1.860<br>(O33)  | 2.344<br>(O38)  | 1.875<br>(O41)  | 1.899<br>(O56)  | 1.933<br>(O62) |                |
| BL for W14 | 2.352<br>(O37) | 1.889<br>(O46)  | 1.913<br>(O49)  | 1.903<br>(O50)  | 1.697<br>(O55)  | 1.874<br>(O62) |                |
| BL for W15 | 2.373<br>(O37) | 1.902<br>(O43)  | 1.899<br>(O47)  | 1.911<br>(O49)  | 1.687<br>(O51)  | 1.899<br>(O52) |                |
| BL for W16 | 1.917<br>(O9)  | 1.914<br>(O1AA) | 1.876<br>(O17)  | 1.912<br>(O27)  | 2.349<br>(O28)  | 1.713<br>(O66) |                |
| BL for W17 | 1.886<br>(O3)  | 2.374<br>(O10)  | 1.925<br>(O11)  | 1.886<br>(O12)  | 1.691<br>(O17)  | 1.920<br>(O34) |                |
| BL for W18 | 2.387<br>(O37) | 1.903<br>(O50)  | 1.927<br>(O52)  | 1.684<br>(O53)  | 1.897<br>(O54)  | 1.887<br>(O57) |                |
| BL for Cu1 | 2.481<br>(O61) | 2.481<br>(O61)  | 2.015<br>(N1)   | 2.015<br>(N1)   | 2.009<br>(N3)   | 2.009<br>(N3)  |                |
| BL for Cu2 | 2.316<br>(O22) | 2.286<br>(N103) | 2.013<br>(N6)   | 2.038<br>(N7)   | 1.995<br>(N9)   | 2.005<br>(N14) |                |
| BL for Cu3 | 2.595<br>(O55) | 2.301<br>(O66)  | 1.992<br>(N17)  | 2.014<br>(O18)  | 2.002<br>(N19)  | 1.999<br>(N20) |                |
| BL for Cu4 | 1.902<br>(O16) | 2.861<br>(O40)  | 1.939<br>(O58)  | 1.916<br>(O102) | 1.938<br>(N11)  |                |                |
| BL for Cu5 | 2.141<br>(O13) | 1.941<br>(O16)  | 2.447<br>(O21)  | 2.559<br>(O29)  | 1.971<br>(O102) | 1.956<br>(N26) |                |
| BV for W1  | 1.9224         | 1.1131          | 0.8952          | 1.1091          | 0.8700          | 0.2223         | 6.1321 (total) |
| BV for W2  | 0.9929         | 0.1934          | 0.9478          | 1.0327          | 1.0779          | 1.9155         | 6.1602 (total) |
| BV for W3  | 0.2272         | 1.0072          | 0.8762          | 1.9852          | 0.8305          | 1.1577         | 6.0839 (total) |
| BV for W4  | 2.0354         | 1.0550          | 0.2092          | 0.9649          | 1.0108          | 0.8762         | 6.1516 (total) |
| BV for W5  | 0.1088         | 1.0817          | 0.8984          | 1.0475          | 2.3396          | 1.0072         | 6.4833 (total) |
| BV for W6  | 0.1847         | 0.9411          | 1.1052          | 1.9501          | 0.9823          | 0.9580         | 6.1213 (total) |
| BV for W7  | 0.9277         | 0.9377          | 1.0740          | 0.9445          | 0.1983          | 2.0870         | 6.1693 (total) |
| BV for W8  | 0.2033         | 1.0626          | 0.9684          | 0.9048          | 1.9224          | 0.9858         | 6.0474 (total) |
| BV for W9  | 0.8546         | 0.1801          | 0.8984          | 1.0253          | 2.0210          | 0.9718         | 5.9512 (total) |
| BV for W10 | 0.1860         | 1.0664          | 0.9211          | 2.0647          | 1.0550          | 0.8158         | 6.1091 (total) |
| BV for W11 | 2.1019         | 0.9445          | 0.1795          | 0.9893          | 0.9684          | 0.9546         | 6.1382 (total) |
| BV for W12 | 0.1601         | 0.9512          | 1.0036          | 0.8984          | 2.2819          | 0.9649         | 6.2601 (total) |
| BV for W13 | 2.0647         | 1.1372          | 0.2019          | 1.0779          | 0.9893          | 0.8762         | 6.3473 (total) |
| BV for W14 | 0.1962         | 1.0253          | 0.9411          | 0.9753          | 2.0354          | 1.0817         | 6.2551 (total) |
| BV for W15 | 0.1820         | 0.9788          | 0.9893          | 0.9478          | 2.1095          | 0.9893         | 6.1968 (total) |

|                   |               |               |               |               |               |               |                       |
|-------------------|---------------|---------------|---------------|---------------|---------------|---------------|-----------------------|
| <b>BV for W16</b> | <b>0.9277</b> | <b>0.9377</b> | <b>1.0740</b> | <b>0.9445</b> | <b>0.1983</b> | <b>1.9224</b> | <b>6.0046 (total)</b> |
| <b>BV for W17</b> | <b>1.0364</b> | <b>0.1814</b> | <b>0.9016</b> | <b>1.0364</b> | <b>2.0795</b> | <b>0.9179</b> | <b>6.1531 (total)</b> |
| <b>BV for W18</b> | <b>0.1732</b> | <b>0.9753</b> | <b>0.8952</b> | <b>2.1322</b> | <b>0.9964</b> | <b>1.0327</b> | <b>6.2049 (total)</b> |
| <b>BV for Cu1</b> | <b>0.1073</b> | <b>0.1073</b> | <b>0.4221</b> | <b>0.4221</b> | <b>0.4493</b> | <b>0.4493</b> | <b>1.9974 (total)</b> |
| <b>BV for Cu2</b> | <b>0.1675</b> | <b>0.2125</b> | <b>0.4445</b> | <b>0.4155</b> | <b>0.4667</b> | <b>0.4542</b> | <b>2.1893 (total)</b> |
| <b>BV for Cu3</b> | <b>0.0788</b> | <b>0.1745</b> | <b>0.4705</b> | <b>0.3790</b> | <b>0.4579</b> | <b>0.4616</b> | <b>2.0223 (total)</b> |
| <b>BV for Cu4</b> | <b>0.5130</b> | <b>0.0384</b> | <b>0.4641</b> | <b>0.4939</b> | <b>0.5444</b> |               | <b>2.0538 (total)</b> |
| <b>BV for Cu5</b> | <b>0.2689</b> | <b>0.4616</b> | <b>0.1176</b> | <b>0.0869</b> | <b>0.4257</b> | <b>0.5185</b> | <b>1.8792 (total)</b> |

**Table S2.** Selected bond lengths (Å) and bond angles (°) for CuFKZP<sub>2</sub>W<sub>18</sub>.

| <b>Bond</b>  | <b>Lengths</b> | <b>Bond</b>  | <b>Lengths</b> |
|--------------|----------------|--------------|----------------|
| C(1)-N(7)    | 1.32(2)        | O(3)-W(17)   | 2.373(10)      |
| C(1)-N(8)    | 1.33(2)        | O(4)-W(11)   | 1.689(11)      |
| C(2)-N(2)    | 1.33(3)        | O(5)-P(1)    | 1.513(11)      |
| C(2)-N(7)    | 1.35(3)        | O(5)-W(8)    | 2.342(10)      |
| C(3)-N(4)    | 1.35(3)        | O(5)-W(10)   | 2.367(11)      |
| C(3)-N(19)   | 1.37(3)        | O(6)-P(1)    | 1.544(10)      |
| C(4)-N(14)   | 1.33(2)        | O(6)-W(3)    | 2.311(10)      |
| C(4)-N(22)   | 1.35(2)        | O(6)-W(2)    | 2.355(10)      |
| C(5)-N(25)   | 1.32(3)        | O(7)-W(13)   | 1.692(11)      |
| C(5)-N(31)   | 1.35(4)        | O(8)-W(10)   | 1.877(10)      |
| C(6)-N(10)   | 1.32(2)        | O(8)-W(3)    | 1.895(10)      |
| C(6)-N(9)    | 1.32(2)        | O(9)-P(1)    | 1.584(10)      |
| N(40)-C(44)  | 1.30(3)        | O(9)-W(16)   | 2.321(10)      |
| N(40)-N(10)  | 1.37(2)        | O(9)-W(6)    | 2.371(11)      |
| C(8)-N(10)   | 1.47(3)        | O(9)-W(12)   | 2.408(10)      |
| C(8)-C(74)   | 1.51(3)        | O(10)-W(5)   | 1.905(11)      |
| C(9)-C(17)   | 1.3900         | O(10)-W(17)  | 1.921(11)      |
| C(9)-C(69)   | 1.3900         | O(11)-W(17)  | 1.692(11)      |
| C(17)-C(87)  | 1.3900         | O(12)-W(8)   | 1.878(11)      |
| C(17)-F(13A) | 1.50(4)        | O(12)-W(17)  | 1.887(11)      |
| C(17)-F(13B) | 1.52(6)        | O(0AA)-W(8)  | 1.905(12)      |
| C(87)-C(24)  | 1.3900         | O(0AA)-W(10) | 1.919(11)      |
| C(24)-C(68)  | 1.3900         | O(14)-W(10)  | 1.693(11)      |
| C(68)-C(69)  | 1.3900         | O(15)-W(10)  | 1.882(10)      |
| C(68)-C(54)  | 1.58(3)        | O(15)-W(6)   | 1.912(10)      |
| C(69)-F(2)   | 1.29(2)        | O(1AA)-W(16) | 1.882(10)      |
| C(10)-N(8)   | 1.48(2)        | O(1AA)-W(8)  | 1.923(10)      |
| C(10)-C(54)  | 1.52(3)        | O(17)-W(16)  | 1.890(11)      |
| C(11)-N(21)  | 1.46(2)        | O(17)-W(17)  | 1.924(10)      |

|             |           |             |           |
|-------------|-----------|-------------|-----------|
| C(11)-C(45) | 1.56(2)   | O(18)-W(5)  | 1.894(11) |
| C(12)-N(29) | 1.29(3)   | O(18)-W(12) | 1.910(11) |
| C(12)-N(21) | 1.33(2)   | O(19)-W(12) | 1.895(10) |
| C(18)-N(5)  | 1.32(2)   | O(19)-W(2)  | 1.911(10) |
| C(18)-N(6)  | 1.33(2)   | O(20)-W(2)  | 1.886(10) |
| C(19)-N(35) | 1.32(2)   | O(20)-W(3)  | 1.933(10) |
| C(19)-N(6)  | 1.35(2)   | O(21)-W(8)  | 1.713(10) |
| C(21)-N(5)  | 1.47(2)   | O(22)-W(3)  | 1.703(11) |
| C(21)-C(45) | 1.55(2)   | O(22)-Cu(2) | 2.317(11) |
| C(25)-C(27) | 1.32(4)   | O(23)-W(6)  | 1.867(10) |
| C(25)-C(83) | 1.43(3)   | O(23)-W(3)  | 1.949(10) |
| C(26)-C(27) | 1.36(4)   | O(24)-W(6)  | 1.708(11) |
| C(26)-C(85) | 1.43(3)   | O(25)-W(6)  | 1.901(11) |
| C(27)-F(10) | 1.38(3)   | O(25)-W(12) | 1.927(11) |
| C(28)-N(11) | 1.34(3)   | O(26)-W(12) | 1.664(12) |
| C(28)-N(24) | 1.37(3)   | O(27)-W(6)  | 1.907(11) |
| C(31)-N(23) | 1.46(2)   | O(27)-W(16) | 1.908(11) |
| C(31)-C(32) | 1.57(3)   | O(28)-W(12) | 1.906(11) |
| C(32)-O(16) | 1.408(19) | O(28)-W(16) | 1.926(11) |
| C(32)-C(34) | 1.52(2)   | O(29)-W(1)  | 1.712(11) |
| C(32)-C(48) | 1.56(3)   | O(30)-W(1)  | 1.867(10) |
| C(33)-C(76) | 1.37(3)   | O(30)-W(10) | 1.955(10) |
| C(33)-C(34) | 1.38(3)   | O(31)-W(3)  | 1.856(10) |
| C(34)-C(66) | 1.38(2)   | O(31)-W(9)  | 1.940(10) |
| C(39)-N(22) | 1.49(2)   | O(32)-W(2)  | 1.874(10) |
| C(39)-C(40) | 1.54(3)   | O(32)-W(11) | 1.913(10) |
| C(40)-O(64) | 1.42(2)   | O(33)-W(13) | 1.861(11) |
| C(40)-C(75) | 1.52(3)   | O(33)-W(5)  | 1.933(11) |
| C(40)-C(41) | 1.55(3)   | O(34)-W(17) | 1.887(11) |
| C(41)-N(27) | 1.47(2)   | O(34)-W(4)  | 1.894(11) |
| C(42)-C(80) | 1.42(4)   | O(35)-W(8)  | 1.902(10) |
| C(42)-C(82) | 1.47(5)   | O(35)-W(7)  | 1.915(10) |
| C(43)-N(15) | 1.31(2)   | O(36)-P(2)  | 1.505(10) |
| C(43)-N(14) | 1.36(2)   | O(36)-W(9)  | 2.377(10) |
| C(44)-N(9)  | 1.34(2)   | O(36)-W(11) | 2.378(10) |
| C(45)-O(63) | 1.418(18) | O(37)-P(2)  | 1.586(10) |
| C(45)-C(84) | 1.50(2)   | O(37)-W(14) | 2.352(10) |
| C(46)-N(26) | 1.33(3)   | O(37)-W(15) | 2.374(11) |

|               |         |             |           |
|---------------|---------|-------------|-----------|
| C(46)-N(31)   | 1.38(4) | O(37)-W(18) | 2.388(10) |
| C(47)-N(23)   | 1.34(3) | O(38)-P(2)  | 1.540(11) |
| C(47)-N(24)   | 1.38(3) | O(38)-W(13) | 2.343(11) |
| C(48)-N(25)   | 1.44(3) | O(38)-W(4)  | 2.362(11) |
| C(49)-N(21)   | 1.33(2) | O(39)-W(4)  | 1.681(11) |
| C(49)-N(1)    | 1.33(2) | O(40)-W(7)  | 1.914(11) |
| O(13)-Cu(5)   | 2.14(3) | O(40)-W(1)  | 1.926(11) |
| C(52)-N(19)   | 1.33(2) | O(41)-W(13) | 1.875(11) |
| C(52)-N(28)   | 1.34(3) | O(41)-W(11) | 1.899(11) |
| C(53)-C(54)   | 1.50(3) | O(42)-W(11) | 1.906(10) |
| C(53)-N(28)   | 1.50(3) | O(42)-W(9)  | 1.929(10) |
| C(54)-O(65)   | 1.41(2) | O(43)-W(9)  | 1.887(10) |
| C(55)-N(27)   | 1.31(2) | O(43)-W(15) | 1.904(11) |
| C(55)-N(18)   | 1.36(2) | O(44)-W(9)  | 1.699(11) |
| N(39)-C(117)  | 1.35(3) | O(45)-W(1)  | 1.868(10) |
| N(39)-N(27)   | 1.38(2) | O(45)-W(9)  | 1.903(11) |
| C(57)-N(17)   | 1.33(2) | O(46)-W(14) | 1.889(10) |
| C(57)-N(58)   | 1.35(3) | O(46)-W(11) | 1.909(10) |
| N(58)-N(59)#1 | 1.32(2) | O(47)-W(15) | 1.900(10) |
| N(59)-N(58)#2 | 1.32(2) | O(47)-W(1)  | 1.934(10) |
| N(59)-C(60)#2 | 1.35(3) | O(48)-W(7)  | 1.874(11) |
| N(59)-C(72)   | 1.49(3) | O(48)-W(4)  | 1.878(11) |
| C(60)-N(17)   | 1.31(2) | O(49)-W(15) | 1.911(11) |
| C(60)-N(59)#1 | 1.35(3) | O(49)-W(14) | 1.912(12) |
| C(61)-N(36)   | 1.30(3) | O(50)-W(18) | 1.903(10) |
| C(61)-N(3)    | 1.36(2) | O(50)-W(14) | 1.903(10) |
| C(62)-N(3)    | 1.30(2) | O(51)-W(15) | 1.687(12) |
| C(62)-N(30)   | 1.31(2) | O(52)-W(15) | 1.899(12) |
| C(66)-C(78)   | 1.36(3) | O(52)-W(18) | 1.927(12) |
| C(66)-F(3)    | 1.38(3) | O(53)-W(18) | 1.684(11) |
| O(99)-C(74)   | 1.46(3) | O(54)-W(18) | 1.896(11) |
| C(72)-C(74)   | 1.58(3) | O(54)-W(7)  | 1.913(11) |
| C(74)-C(106)  | 1.50(3) | O(55)-W(14) | 1.696(11) |
| C(75)-C(79)   | 1.37(3) | O(56)-W(13) | 1.898(11) |
| C(75)-C(80)   | 1.46(3) | O(56)-W(4)  | 1.911(11) |
| C(76)-C(77)   | 1.38(4) | O(57)-W(18) | 1.887(11) |
| C(77)-C(78)   | 1.33(4) | O(57)-W(4)  | 1.947(10) |
| C(77)-F(4)    | 1.37(2) | O(58)-Cu(4) | 1.939(12) |

|              |           |                 |           |
|--------------|-----------|-----------------|-----------|
| C(79)-F(5)   | 1.31(3)   | O(59)-P(2)      | 1.545(11) |
| C(79)-C(81)  | 1.41(3)   | O(59)-W(1)      | 2.318(11) |
| C(81)-C(82)  | 1.36(4)   | O(59)-W(7)      | 2.350(10) |
| C(82)-F(7)   | 1.37(3)   | O(60)-W(7)      | 1.690(11) |
| C(83)-F(1)   | 1.34(3)   | O(61)-W(2)      | 1.713(10) |
| C(83)-C(84)  | 1.35(3)   | O(62)-W(14)     | 1.875(11) |
| C(84)-C(85)  | 1.37(3)   | O(62)-W(13)     | 1.932(10) |
| N(1)-N(29)   | 1.37(2)   | O(66)-W(16)#3   | 1.713(11) |
| N(1)-Cu(1)   | 2.014(13) | O(66)-Cu(3)     | 2.303(11) |
| N(2)-N(8)    | 1.34(2)   | Cu(1)-N(3)#4    | 2.010(14) |
| N(3)-Cu(1)   | 2.010(14) | Cu(1)-N(1)#4    | 2.014(13) |
| N(4)-N(28)   | 1.36(2)   | Cu(2)-O(103)    | 2.29(3)   |
| N(5)-N(35)   | 1.34(2)   | Cu(4)-Cu(5)     | 2.968(3)  |
| N(6)-Cu(2)   | 2.014(14) | W(16)-O(66)#5   | 1.712(11) |
| N(7)-Cu(2)   | 2.039(15) | C(101)-C(103)   | 1.3900    |
| N(9)-Cu(2)   | 1.995(14) | C(101)-C(106)   | 1.3900    |
| N(11)-N(23)  | 1.37(2)   | C(103)-C(105)   | 1.3900    |
| N(11)-Cu(4)  | 1.938(17) | C(105)-F(8)     | 1.37(4)   |
| O(102)-Cu(4) | 1.916(12) | C(105)-C(102)   | 1.3900    |
| O(102)-Cu(5) | 1.972(12) | C(102)-C(104)   | 1.3900    |
| N(14)-Cu(2)  | 2.006(14) | C(104)-C(106)   | 1.3900    |
| N(15)-N(22)  | 1.36(2)   | C(104)-F(9)     | 1.45(3)   |
| O(16)-Cu(4)  | 1.900(12) | O(100)-C(7)     | 1.38(3)   |
| O(16)-Cu(5)  | 1.941(12) | C(7)-C(111)     | 1.47(3)   |
| N(17)-Cu(3)  | 1.992(14) | C(7)-C(118)     | 1.54(3)   |
| N(18)-C(117) | 1.34(3)   | C(7)-C(120)     | 1.55(4)   |
| N(18)-Cu(3)  | 2.014(16) | N(100)-N(101)   | 1.26(3)   |
| N(19)-Cu(3)  | 2.002(16) | N(100)-C(119)   | 1.36(4)   |
| N(20)-C(119) | 1.33(3)   | C(120)-N(101)#6 | 1.52(4)   |
| N(20)-C(121) | 1.40(3)   | C(121)-N(101)   | 1.35(3)   |
| N(20)-Cu(3)  | 1.999(18) | N(101)-C(120)#7 | 1.52(4)   |
| N(25)-N(26)  | 1.37(2)   | C(111)-C(116)   | 1.3900    |
| N(26)-Cu(5)  | 1.957(19) | C(111)-C(114)   | 1.3900    |
| N(30)-N(36)  | 1.37(2)   | C(116)-C(115)   | 1.3900    |
| N(30)-C(118) | 1.46(3)   | C(116)-F(12)    | 1.41(4)   |
| O(1)-W(5)    | 1.698(11) | C(115)-C(113)   | 1.3900    |
| O(2)-W(5)    | 1.881(9)  | C(113)-F(11)    | 1.366(17) |
| O(2)-W(2)    | 1.898(10) | C(113)-C(112)   | 1.3900    |

|                     |               |                    |               |
|---------------------|---------------|--------------------|---------------|
| O(3)-P(1)           | 1.527(11)     | C(112)-C(114)      | 1.3900        |
| O(3)-W(5)           | 2.335(10)     | F(13A)-F(13B)      | 1.37(6)       |
| <b>Bond</b>         | <b>Angles</b> | <b>Bond</b>        | <b>Angles</b> |
| N(7)-C(1)-N(8)      | 109.5(17)     | O(16)-Cu(5)-O(102) | 78.5(5)       |
| N(2)-C(2)-N(7)      | 111.6(19)     | N(26)-Cu(5)-O(102) | 168.8(7)      |
| N(4)-C(3)-N(19)     | 113.6(19)     | O(16)-Cu(5)-O(13)  | 172.8(7)      |
| N(14)-C(4)-N(22)    | 109.5(16)     | N(26)-Cu(5)-O(13)  | 95.6(8)       |
| N(25)-C(5)-N(31)    | 107(3)        | O(102)-Cu(5)-O(13) | 94.7(6)       |
| N(10)-C(6)-N(9)     | 111.1(16)     | O(16)-Cu(5)-Cu(4)  | 38.9(3)       |
| C(44)-N(40)-N(10)   | 103.9(17)     | N(26)-Cu(5)-Cu(4)  | 130.2(6)      |
| N(10)-C(8)-C(74)    | 111.3(19)     | O(102)-Cu(5)-Cu(4) | 39.6(4)       |
| C(17)-C(9)-C(69)    | 120.0         | O(13)-Cu(5)-Cu(4)  | 134.2(5)      |
| C(87)-C(17)-C(9)    | 120.0         | O(29)-W(1)-O(30)   | 99.3(5)       |
| C(87)-C(17)-F(13A)  | 124(3)        | O(29)-W(1)-O(45)   | 104.4(5)      |
| C(9)-C(17)-F(13A)   | 113(3)        | O(30)-W(1)-O(45)   | 89.7(4)       |
| C(87)-C(17)-F(13B)  | 114(3)        | O(29)-W(1)-O(40)   | 97.1(5)       |
| C(9)-C(17)-F(13B)   | 113(3)        | O(30)-W(1)-O(40)   | 90.9(4)       |
| F(13A)-C(17)-F(13B) | 54(2)         | O(45)-W(1)-O(40)   | 158.1(5)      |
| C(24)-C(87)-C(17)   | 120.0         | O(29)-W(1)-O(47)   | 96.4(5)       |
| C(87)-C(24)-C(68)   | 120.0         | O(30)-W(1)-O(47)   | 164.3(4)      |
| C(69)-C(68)-C(24)   | 120.0         | O(45)-W(1)-O(47)   | 85.3(4)       |
| C(69)-C(68)-C(54)   | 118.5(18)     | O(40)-W(1)-O(47)   | 88.2(4)       |
| C(24)-C(68)-C(54)   | 121.3(18)     | O(29)-W(1)-O(59)   | 170.4(5)      |
| F(2)-C(69)-C(68)    | 122.1(19)     | O(30)-W(1)-O(59)   | 83.8(4)       |
| F(2)-C(69)-C(9)     | 117.7(19)     | O(45)-W(1)-O(59)   | 84.6(4)       |
| C(68)-C(69)-C(9)    | 120.0         | O(40)-W(1)-O(59)   | 73.7(4)       |
| N(8)-C(10)-C(54)    | 107.8(15)     | O(47)-W(1)-O(59)   | 80.9(4)       |
| N(21)-C(11)-C(45)   | 109.8(13)     | O(61)-W(2)-O(32)   | 97.9(5)       |
| N(29)-C(12)-N(21)   | 102.9(16)     | O(61)-W(2)-O(20)   | 101.6(5)      |
| N(5)-C(18)-N(6)     | 109.7(15)     | O(32)-W(2)-O(20)   | 91.2(4)       |
| N(35)-C(19)-N(6)    | 113.4(17)     | O(61)-W(2)-O(2)    | 100.9(5)      |
| N(5)-C(21)-C(45)    | 109.5(14)     | O(32)-W(2)-O(2)    | 88.2(4)       |
| C(27)-C(25)-C(83)   | 114(2)        | O(20)-W(2)-O(2)    | 157.3(4)      |
| C(27)-C(26)-C(85)   | 116(2)        | O(61)-W(2)-O(19)   | 97.6(5)       |
| C(25)-C(27)-C(26)   | 128(2)        | O(32)-W(2)-O(19)   | 164.2(4)      |
| C(25)-C(27)-F(10)   | 117(3)        | O(20)-W(2)-O(19)   | 88.4(4)       |
| C(26)-C(27)-F(10)   | 115(3)        | O(2)-W(2)-O(19)    | 86.1(4)       |
| N(11)-C(28)-N(24)   | 112(2)        | O(61)-W(2)-O(6)    | 174.8(5)      |

|                   |           |                  |          |
|-------------------|-----------|------------------|----------|
| N(23)-C(31)-C(32) | 110.4(14) | O(32)-W(2)-O(6)  | 82.6(4)  |
| O(16)-C(32)-C(34) | 111.3(14) | O(20)-W(2)-O(6)  | 73.2(4)  |
| O(16)-C(32)-C(48) | 108.2(15) | O(2)-W(2)-O(6)   | 84.2(4)  |
| C(34)-C(32)-C(48) | 113.7(16) | O(19)-W(2)-O(6)  | 82.2(4)  |
| O(16)-C(32)-C(31) | 108.0(15) | O(22)-W(3)-O(31) | 98.3(5)  |
| C(34)-C(32)-C(31) | 111.3(15) | O(22)-W(3)-O(8)  | 99.7(5)  |
| C(48)-C(32)-C(31) | 103.9(14) | O(31)-W(3)-O(8)  | 88.8(4)  |
| C(76)-C(33)-C(34) | 123(2)    | O(22)-W(3)-O(20) | 101.9(5) |
| C(33)-C(34)-C(66) | 114.0(18) | O(31)-W(3)-O(20) | 92.6(4)  |
| C(33)-C(34)-C(32) | 122.0(15) | O(8)-W(3)-O(20)  | 157.9(4) |
| C(66)-C(34)-C(32) | 123.6(18) | O(22)-W(3)-O(23) | 95.7(5)  |
| N(22)-C(39)-C(40) | 110.1(15) | O(31)-W(3)-O(23) | 165.4(4) |
| O(64)-C(40)-C(75) | 109.8(18) | O(8)-W(3)-O(23)  | 85.1(4)  |
| O(64)-C(40)-C(39) | 110.9(15) | O(20)-W(3)-O(23) | 88.2(4)  |
| C(75)-C(40)-C(39) | 110.3(18) | O(22)-W(3)-O(6)  | 174.9(5) |
| O(64)-C(40)-C(41) | 105.3(17) | O(31)-W(3)-O(6)  | 84.1(4)  |
| C(75)-C(40)-C(41) | 109.7(17) | O(8)-W(3)-O(6)   | 84.7(4)  |
| C(39)-C(40)-C(41) | 110.8(17) | O(20)-W(3)-O(6)  | 73.5(4)  |
| N(27)-C(41)-C(40) | 109.9(17) | O(23)-W(3)-O(6)  | 82.2(4)  |
| C(80)-C(42)-C(82) | 113(3)    | O(39)-W(4)-O(48) | 103.9(5) |
| N(15)-C(43)-N(14) | 113.4(19) | O(39)-W(4)-O(34) | 98.9(5)  |
| N(40)-C(44)-N(9)  | 114.1(18) | O(48)-W(4)-O(34) | 89.4(5)  |
| O(63)-C(45)-C(84) | 106.0(13) | O(39)-W(4)-O(56) | 100.2(5) |
| O(63)-C(45)-C(21) | 109.4(13) | O(48)-W(4)-O(56) | 155.7(5) |
| C(84)-C(45)-C(21) | 112.3(14) | O(34)-W(4)-O(56) | 89.6(5)  |
| O(63)-C(45)-C(11) | 107.6(13) | O(39)-W(4)-O(57) | 96.6(5)  |
| C(84)-C(45)-C(11) | 113.6(14) | O(48)-W(4)-O(57) | 86.2(5)  |
| C(21)-C(45)-C(11) | 107.7(13) | O(34)-W(4)-O(57) | 164.5(4) |
| N(26)-C(46)-N(31) | 110(3)    | O(56)-W(4)-O(57) | 88.5(4)  |
| N(23)-C(47)-N(24) | 108.3(18) | O(39)-W(4)-O(38) | 172.0(5) |
| N(25)-C(48)-C(32) | 110.4(16) | O(48)-W(4)-O(38) | 84.0(4)  |
| N(21)-C(49)-N(1)  | 108.3(14) | O(34)-W(4)-O(38) | 82.3(4)  |
| N(19)-C(52)-N(28) | 109.1(17) | O(56)-W(4)-O(38) | 71.8(4)  |
| C(54)-C(53)-N(28) | 110.7(19) | O(57)-W(4)-O(38) | 82.5(4)  |
| O(65)-C(54)-C(53) | 111.6(17) | O(1)-W(5)-O(2)   | 102.1(5) |
| O(65)-C(54)-C(10) | 111.1(19) | O(1)-W(5)-O(18)  | 98.6(5)  |
| C(53)-C(54)-C(10) | 109.6(19) | O(2)-W(5)-O(18)  | 86.0(4)  |
| O(65)-C(54)-C(68) | 104.4(18) | O(1)-W(5)-O(10)  | 98.7(5)  |



|                       |           |                  |          |
|-----------------------|-----------|------------------|----------|
| C(53)-C(54)-C(68)     | 113.0(18) | O(2)-W(5)-O(10)  | 159.1(5) |
| C(10)-C(54)-C(68)     | 107.0(16) | O(18)-W(5)-O(10) | 92.2(5)  |
| N(27)-C(55)-N(18)     | 109.2(17) | O(1)-W(5)-O(33)  | 97.3(5)  |
| C(117)-N(39)-N(27)    | 102.6(17) | O(2)-W(5)-O(33)  | 86.9(4)  |
| N(17)-C(57)-N(58)     | 114.5(16) | O(18)-W(5)-O(33) | 163.6(5) |
| N(59)#1-N(58)-C(57)   | 101.3(15) | O(10)-W(5)-O(33) | 89.2(5)  |
| N(58)#2-N(59)-C(60)#2 | 111.4(17) | O(1)-W(5)-O(3)   | 173.2(5) |
| N(58)#2-N(59)-C(72)   | 123.0(19) | O(2)-W(5)-O(3)   | 84.5(4)  |
| C(60)#2-N(59)-C(72)   | 125.2(19) | O(18)-W(5)-O(3)  | 83.2(4)  |
| N(17)-C(60)-N(59)#1   | 108.8(18) | O(10)-W(5)-O(3)  | 74.7(4)  |
| N(36)-C(61)-N(3)      | 113.6(19) | O(33)-W(5)-O(3)  | 81.4(4)  |
| N(3)-C(62)-N(30)      | 110.5(17) | O(24)-W(6)-O(23) | 102.2(5) |
| C(78)-C(66)-F(3)      | 115.9(19) | O(24)-W(6)-O(25) | 101.3(5) |
| C(78)-C(66)-C(34)     | 125(2)    | O(23)-W(6)-O(25) | 90.3(5)  |
| F(3)-C(66)-C(34)      | 118(2)    | O(24)-W(6)-O(27) | 102.0(5) |
| N(59)-C(72)-C(74)     | 105.9(18) | O(23)-W(6)-O(27) | 155.7(5) |
| O(99)-C(74)-C(106)    | 98.7(19)  | O(25)-W(6)-O(27) | 87.0(5)  |
| O(99)-C(74)-C(8)      | 108(2)    | O(24)-W(6)-O(15) | 101.1(5) |
| C(106)-C(74)-C(8)     | 118(2)    | O(23)-W(6)-O(15) | 84.9(4)  |
| O(99)-C(74)-C(72)     | 109.3(19) | O(25)-W(6)-O(15) | 157.6(5) |
| C(106)-C(74)-C(72)    | 114.0(19) | O(27)-W(6)-O(15) | 88.6(5)  |
| C(8)-C(74)-C(72)      | 107.3(19) | O(24)-W(6)-O(9)  | 172.9(5) |
| C(79)-C(75)-C(80)     | 117(2)    | O(23)-W(6)-O(9)  | 83.7(4)  |
| C(79)-C(75)-C(40)     | 122(2)    | O(25)-W(6)-O(9)  | 74.5(4)  |
| C(80)-C(75)-C(40)     | 120(2)    | O(27)-W(6)-O(9)  | 72.3(4)  |
| C(33)-C(76)-C(77)     | 117(2)    | O(15)-W(6)-O(9)  | 83.2(4)  |
| C(78)-C(77)-F(4)      | 118(2)    | O(60)-W(7)-O(48) | 102.8(5) |
| C(78)-C(77)-C(76)     | 124(2)    | O(60)-W(7)-O(54) | 97.4(5)  |
| F(4)-C(77)-C(76)      | 118(2)    | O(48)-W(7)-O(54) | 86.2(5)  |
| C(77)-C(78)-C(66)     | 116(2)    | O(60)-W(7)-O(40) | 99.2(5)  |
| F(5)-C(79)-C(75)      | 121(2)    | O(48)-W(7)-O(40) | 157.9(4) |
| F(5)-C(79)-C(81)      | 115(2)    | O(54)-W(7)-O(40) | 89.5(5)  |
| C(75)-C(79)-C(81)     | 124(3)    | O(60)-W(7)-O(35) | 97.5(5)  |
| C(42)-C(80)-C(75)     | 123(3)    | O(48)-W(7)-O(35) | 88.3(4)  |
| C(82)-C(81)-C(79)     | 116(3)    | O(54)-W(7)-O(35) | 165.0(4) |
| C(81)-C(82)-F(7)      | 120(3)    | O(40)-W(7)-O(35) | 90.4(4)  |
| C(81)-C(82)-C(42)     | 127(3)    | O(60)-W(7)-O(59) | 172.2(5) |
| F(7)-C(82)-C(42)      | 113(3)    | O(48)-W(7)-O(59) | 84.9(4)  |

|                    |           |                    |          |
|--------------------|-----------|--------------------|----------|
| F(1)-C(83)-C(84)   | 120.5(19) | O(54)-W(7)-O(59)   | 82.2(4)  |
| F(1)-C(83)-C(25)   | 116(2)    | O(40)-W(7)-O(59)   | 73.1(4)  |
| C(84)-C(83)-C(25)  | 124(2)    | O(35)-W(7)-O(59)   | 83.4(4)  |
| C(83)-C(84)-C(85)  | 118.6(18) | O(21)-W(8)-O(12)   | 102.8(5) |
| C(83)-C(84)-C(45)  | 121.6(19) | O(21)-W(8)-O(35)   | 97.2(5)  |
| C(85)-C(84)-C(45)  | 119.7(16) | O(12)-W(8)-O(35)   | 89.8(4)  |
| C(84)-C(85)-C(26)  | 120(2)    | O(21)-W(8)-O(0AA)  | 98.5(5)  |
| C(49)-N(1)-N(29)   | 102.6(15) | O(12)-W(8)-O(0AA)  | 158.7(4) |
| C(49)-N(1)-Cu(1)   | 120.8(11) | O(35)-W(8)-O(0AA)  | 88.8(5)  |
| N(29)-N(1)-Cu(1)   | 136.2(14) | O(21)-W(8)-O(1AA)  | 97.5(5)  |
| C(2)-N(2)-N(8)     | 104.4(17) | O(12)-W(8)-O(1AA)  | 87.2(5)  |
| C(62)-N(3)-C(61)   | 103.5(16) | O(35)-W(8)-O(1AA)  | 165.3(4) |
| C(62)-N(3)-Cu(1)   | 130.8(13) | O(0AA)-W(8)-O(1AA) | 88.8(5)  |
| C(61)-N(3)-Cu(1)   | 125.6(13) | O(21)-W(8)-O(5)    | 172.2(5) |
| C(3)-N(4)-N(28)    | 101.4(19) | O(12)-W(8)-O(5)    | 84.8(4)  |
| C(18)-N(5)-N(35)   | 110.2(14) | O(35)-W(8)-O(5)    | 84.8(4)  |
| C(18)-N(5)-C(21)   | 129.0(15) | O(0AA)-W(8)-O(5)   | 73.9(4)  |
| N(35)-N(5)-C(21)   | 120.5(14) | O(1AA)-W(8)-O(5)   | 80.6(4)  |
| C(18)-N(6)-C(19)   | 103.5(15) | O(44)-W(9)-O(43)   | 100.1(5) |
| C(18)-N(6)-Cu(2)   | 119.8(12) | O(44)-W(9)-O(45)   | 103.3(5) |
| C(19)-N(6)-Cu(2)   | 136.5(13) | O(43)-W(9)-O(45)   | 87.9(4)  |
| C(1)-N(7)-C(2)     | 104.8(16) | O(44)-W(9)-O(42)   | 99.0(5)  |
| C(1)-N(7)-Cu(2)    | 127.7(13) | O(43)-W(9)-O(42)   | 92.7(4)  |
| C(2)-N(7)-Cu(2)    | 127.4(13) | O(45)-W(9)-O(42)   | 157.2(4) |
| C(1)-N(8)-N(2)     | 109.6(16) | O(44)-W(9)-O(31)   | 95.9(5)  |
| C(1)-N(8)-C(10)    | 129.8(18) | O(43)-W(9)-O(31)   | 163.9(5) |
| N(2)-N(8)-C(10)    | 120.5(17) | O(45)-W(9)-O(31)   | 86.7(4)  |
| C(6)-N(9)-C(44)    | 103.1(15) | O(42)-W(9)-O(31)   | 86.6(4)  |
| C(6)-N(9)-Cu(2)    | 126.9(12) | O(44)-W(9)-O(36)   | 171.9(5) |
| C(44)-N(9)-Cu(2)   | 130.0(12) | O(43)-W(9)-O(36)   | 83.5(4)  |
| C(6)-N(10)-N(40)   | 107.7(16) | O(45)-W(9)-O(36)   | 84.0(4)  |
| C(6)-N(10)-C(8)    | 130.9(19) | O(42)-W(9)-O(36)   | 73.4(4)  |
| N(40)-N(10)-C(8)   | 121.3(18) | O(31)-W(9)-O(36)   | 80.8(4)  |
| C(28)-N(11)-N(23)  | 105.2(17) | O(14)-W(10)-O(8)   | 101.7(5) |
| C(28)-N(11)-Cu(4)  | 132.6(14) | O(14)-W(10)-O(15)  | 98.1(5)  |
| N(23)-N(11)-Cu(4)  | 122.2(13) | O(8)-W(10)-O(15)   | 87.8(4)  |
| Cu(4)-O(102)-Cu(5) | 99.5(5)   | O(14)-W(10)-O(0AA) | 102.2(5) |
| C(4)-N(14)-C(43)   | 104.1(15) | O(8)-W(10)-O(0AA)  | 155.9(5) |

|                     |           |                    |          |
|---------------------|-----------|--------------------|----------|
| C(4)-N(14)-Cu(2)    | 127.6(12) | O(15)-W(10)-O(0AA) | 92.3(5)  |
| C(43)-N(14)-Cu(2)   | 128.2(13) | O(14)-W(10)-O(30)  | 96.6(5)  |
| C(43)-N(15)-N(22)   | 104.5(16) | O(8)-W(10)-O(30)   | 86.3(4)  |
| C(32)-O(16)-Cu(4)   | 129.0(12) | O(15)-W(10)-O(30)  | 165.0(4) |
| C(32)-O(16)-Cu(5)   | 129.1(11) | O(0AA)-W(10)-O(30) | 87.5(4)  |
| Cu(4)-O(16)-Cu(5)   | 101.2(5)  | O(14)-W(10)-O(5)   | 175.2(5) |
| C(60)-N(17)-C(57)   | 103.9(16) | O(8)-W(10)-O(5)    | 83.0(4)  |
| C(60)-N(17)-Cu(3)   | 126.8(13) | O(15)-W(10)-O(5)   | 82.8(4)  |
| C(57)-N(17)-Cu(3)   | 129.2(13) | O(0AA)-W(10)-O(5)  | 73.1(4)  |
| C(117)-N(18)-C(55)  | 104.2(17) | O(30)-W(10)-O(5)   | 82.7(4)  |
| C(117)-N(18)-Cu(3)  | 128.3(14) | O(4)-W(11)-O(41)   | 104.2(5) |
| C(55)-N(18)-Cu(3)   | 126.8(13) | O(4)-W(11)-O(42)   | 98.1(5)  |
| C(52)-N(19)-C(3)    | 103.8(17) | O(41)-W(11)-O(42)  | 157.7(4) |
| C(52)-N(19)-Cu(3)   | 127.0(14) | O(4)-W(11)-O(46)   | 98.5(5)  |
| C(3)-N(19)-Cu(3)    | 122.2(15) | O(41)-W(11)-O(46)  | 87.1(5)  |
| C(119)-N(20)-C(121) | 106(2)    | O(42)-W(11)-O(46)  | 90.4(5)  |
| C(119)-N(20)-Cu(3)  | 128.7(17) | O(4)-W(11)-O(32)   | 97.0(5)  |
| C(121)-N(20)-Cu(3)  | 124.7(15) | O(41)-W(11)-O(32)  | 87.7(4)  |
| C(49)-N(21)-C(12)   | 111.7(14) | O(42)-W(11)-O(32)  | 88.9(4)  |
| C(49)-N(21)-C(11)   | 126.7(14) | O(46)-W(11)-O(32)  | 164.4(4) |
| C(12)-N(21)-C(11)   | 121.3(15) | O(4)-W(11)-O(36)   | 171.9(5) |
| C(4)-N(22)-N(15)    | 108.4(16) | O(41)-W(11)-O(36)  | 83.9(4)  |
| C(4)-N(22)-C(39)    | 128.2(17) | O(42)-W(11)-O(36)  | 73.8(4)  |
| N(15)-N(22)-C(39)   | 123.2(16) | O(46)-W(11)-O(36)  | 82.0(4)  |
| C(47)-N(23)-N(11)   | 109.9(17) | O(32)-W(11)-O(36)  | 82.9(4)  |
| C(47)-N(23)-C(31)   | 127.8(17) | O(26)-W(12)-O(19)  | 102.6(5) |
| N(11)-N(23)-C(31)   | 121.8(16) | O(26)-W(12)-O(28)  | 101.7(5) |
| C(28)-N(24)-C(47)   | 104.9(19) | O(19)-W(12)-O(28)  | 155.7(4) |
| C(5)-N(25)-N(26)    | 112(2)    | O(26)-W(12)-O(18)  | 102.8(5) |
| C(5)-N(25)-C(48)    | 129(2)    | O(19)-W(12)-O(18)  | 84.7(5)  |
| N(26)-N(25)-C(48)   | 119.8(17) | O(28)-W(12)-O(18)  | 88.8(5)  |
| C(46)-N(26)-N(25)   | 104(2)    | O(26)-W(12)-O(25)  | 101.0(5) |
| C(46)-N(26)-Cu(5)   | 132(2)    | O(19)-W(12)-O(25)  | 89.2(5)  |
| N(25)-N(26)-Cu(5)   | 122.5(14) | O(28)-W(12)-O(25)  | 87.4(5)  |
| C(55)-N(27)-N(39)   | 110.4(17) | O(18)-W(12)-O(25)  | 156.1(4) |
| C(55)-N(27)-C(41)   | 129.2(17) | O(26)-W(12)-O(9)   | 171.7(5) |
| N(39)-N(27)-C(41)   | 119.4(17) | O(19)-W(12)-O(9)   | 83.5(4)  |
| C(52)-N(28)-N(4)    | 112.1(18) | O(28)-W(12)-O(9)   | 72.4(4)  |

|                    |           |                   |          |
|--------------------|-----------|-------------------|----------|
| C(52)-N(28)-C(53)  | 128.2(18) | O(18)-W(12)-O(9)  | 83.2(4)  |
| N(4)-N(28)-C(53)   | 119.3(19) | O(25)-W(12)-O(9)  | 73.2(4)  |
| C(12)-N(29)-N(1)   | 114.4(18) | O(7)-W(13)-O(33)  | 98.9(5)  |
| C(62)-N(30)-N(36)  | 109.5(15) | O(7)-W(13)-O(41)  | 102.7(5) |
| C(62)-N(30)-C(118) | 133.6(17) | O(33)-W(13)-O(41) | 88.5(5)  |
| N(36)-N(30)-C(118) | 116.8(16) | O(7)-W(13)-O(56)  | 99.3(5)  |
| C(5)-N(31)-C(46)   | 106(3)    | O(33)-W(13)-O(56) | 90.4(4)  |
| N(18)-C(117)-N(39) | 113(2)    | O(41)-W(13)-O(56) | 157.8(5) |
| C(19)-N(35)-N(5)   | 103.2(14) | O(7)-W(13)-O(62)  | 97.3(5)  |
| C(61)-N(36)-N(30)  | 102.9(16) | O(33)-W(13)-O(62) | 163.6(4) |
| W(5)-O(2)-W(2)     | 150.9(6)  | O(41)-W(13)-O(62) | 85.4(5)  |
| P(1)-O(3)-W(5)     | 128.1(6)  | O(56)-W(13)-O(62) | 89.6(4)  |
| P(1)-O(3)-W(17)    | 127.4(6)  | O(7)-W(13)-O(38)  | 171.7(5) |
| W(5)-O(3)-W(17)    | 90.3(4)   | O(33)-W(13)-O(38) | 82.7(4)  |
| P(1)-O(5)-W(8)     | 127.9(6)  | O(41)-W(13)-O(38) | 85.4(4)  |
| P(1)-O(5)-W(10)    | 127.7(6)  | O(56)-W(13)-O(38) | 72.5(4)  |
| W(8)-O(5)-W(10)    | 90.7(4)   | O(62)-W(13)-O(38) | 81.6(4)  |
| P(1)-O(6)-W(3)     | 128.3(6)  | O(55)-W(14)-O(62) | 103.2(5) |
| P(1)-O(6)-W(2)     | 127.9(6)  | O(55)-W(14)-O(46) | 103.9(5) |
| W(3)-O(6)-W(2)     | 91.2(3)   | O(62)-W(14)-O(46) | 86.8(5)  |
| W(10)-O(8)-W(3)    | 150.9(6)  | O(55)-W(14)-O(50) | 98.7(5)  |
| P(1)-O(9)-W(16)    | 124.1(6)  | O(62)-W(14)-O(50) | 89.0(5)  |
| P(1)-O(9)-W(6)     | 126.0(6)  | O(46)-W(14)-O(50) | 157.3(4) |
| W(16)-O(9)-W(6)    | 91.2(3)   | O(55)-W(14)-O(49) | 99.9(5)  |
| P(1)-O(9)-W(12)    | 124.8(6)  | O(62)-W(14)-O(49) | 156.8(4) |
| W(16)-O(9)-W(12)   | 90.6(3)   | O(46)-W(14)-O(49) | 88.8(5)  |
| W(6)-O(9)-W(12)    | 89.4(3)   | O(50)-W(14)-O(49) | 86.3(5)  |
| W(5)-O(10)-W(17)   | 121.5(5)  | O(55)-W(14)-O(37) | 168.8(4) |
| W(8)-O(12)-W(17)   | 152.3(6)  | O(62)-W(14)-O(37) | 83.8(4)  |
| W(8)-O(0AA)-W(10)  | 122.3(5)  | O(46)-W(14)-O(37) | 85.0(4)  |
| W(10)-O(15)-W(6)   | 150.9(6)  | O(50)-W(14)-O(37) | 72.4(4)  |
| W(16)-O(1AA)-W(8)  | 149.3(6)  | O(49)-W(14)-O(37) | 73.2(4)  |
| W(16)-O(17)-W(17)  | 150.6(7)  | O(51)-W(15)-O(52) | 100.0(6) |
| W(5)-O(18)-W(12)   | 152.2(6)  | O(51)-W(15)-O(47) | 102.6(5) |
| W(12)-O(19)-W(2)   | 151.9(6)  | O(52)-W(15)-O(47) | 90.6(5)  |
| W(2)-O(20)-W(3)    | 121.7(5)  | O(51)-W(15)-O(43) | 101.8(6) |
| W(3)-O(22)-Cu(2)   | 157.8(7)  | O(52)-W(15)-O(43) | 158.2(5) |
| W(6)-O(23)-W(3)    | 152.5(6)  | O(47)-W(15)-O(43) | 85.6(4)  |

|                   |          |                      |          |
|-------------------|----------|----------------------|----------|
| W(6)-O(25)-W(12)  | 122.9(5) | O(51)-W(15)-O(49)    | 101.4(5) |
| W(6)-O(27)-W(16)  | 123.0(6) | O(52)-W(15)-O(49)    | 87.4(5)  |
| W(12)-O(28)-W(16) | 122.7(6) | O(47)-W(15)-O(49)    | 155.9(5) |
| W(1)-O(30)-W(10)  | 161.5(6) | O(43)-W(15)-O(49)    | 87.4(4)  |
| W(3)-O(31)-W(9)   | 163.1(6) | O(51)-W(15)-O(37)    | 171.6(5) |
| W(2)-O(32)-W(11)  | 163.4(6) | O(52)-W(15)-O(37)    | 74.2(4)  |
| W(13)-O(33)-W(5)  | 163.4(6) | O(47)-W(15)-O(37)    | 83.7(4)  |
| W(17)-O(34)-W(4)  | 163.8(7) | O(43)-W(15)-O(37)    | 84.1(4)  |
| W(8)-O(35)-W(7)   | 161.1(6) | O(49)-W(15)-O(37)    | 72.7(4)  |
| P(2)-O(36)-W(9)   | 126.7(6) | O(66)#5-W(16)-O(1AA) | 103.1(5) |
| P(2)-O(36)-W(11)  | 128.9(6) | O(66)#5-W(16)-O(17)  | 101.1(5) |
| W(9)-O(36)-W(11)  | 90.1(3)  | O(1AA)-W(16)-O(17)   | 87.7(5)  |
| P(2)-O(37)-W(14)  | 125.4(6) | O(66)#5-W(16)-O(27)  | 100.5(5) |
| P(2)-O(37)-W(15)  | 124.9(6) | O(1AA)-W(16)-O(27)   | 89.3(5)  |
| W(14)-O(37)-W(15) | 90.8(3)  | O(17)-W(16)-O(27)    | 158.3(4) |
| P(2)-O(37)-W(18)  | 124.4(5) | O(66)#5-W(16)-O(28)  | 98.6(5)  |
| W(14)-O(37)-W(18) | 90.9(3)  | O(1AA)-W(16)-O(28)   | 158.3(4) |
| W(15)-O(37)-W(18) | 89.7(3)  | O(17)-W(16)-O(28)    | 89.0(5)  |
| P(2)-O(38)-W(13)  | 128.0(6) | O(27)-W(16)-O(28)    | 85.9(5)  |
| P(2)-O(38)-W(4)   | 127.5(6) | O(66)#5-W(16)-O(9)   | 170.7(5) |
| W(13)-O(38)-W(4)  | 91.3(4)  | O(1AA)-W(16)-O(9)    | 84.1(4)  |
| W(7)-O(40)-W(1)   | 121.4(5) | O(17)-W(16)-O(9)     | 84.9(4)  |
| W(13)-O(41)-W(11) | 151.2(6) | O(27)-W(16)-O(9)     | 73.5(4)  |
| W(11)-O(42)-W(9)  | 122.7(5) | O(28)-W(16)-O(9)     | 74.2(4)  |
| W(9)-O(43)-W(15)  | 149.7(6) | O(11)-W(17)-O(12)    | 102.7(5) |
| W(1)-O(45)-W(9)   | 151.1(6) | O(11)-W(17)-O(34)    | 100.6(5) |
| W(14)-O(46)-W(11) | 149.4(6) | O(12)-W(17)-O(34)    | 87.3(5)  |
| W(15)-O(47)-W(1)  | 152.2(6) | O(11)-W(17)-O(10)    | 99.9(5)  |
| W(7)-O(48)-W(4)   | 153.1(6) | O(12)-W(17)-O(10)    | 157.3(4) |
| W(15)-O(49)-W(14) | 123.3(6) | O(34)-W(17)-O(10)    | 90.8(5)  |
| W(18)-O(50)-W(14) | 125.1(5) | O(11)-W(17)-O(17)    | 97.0(5)  |
| W(15)-O(52)-W(18) | 122.8(6) | O(12)-W(17)-O(17)    | 86.0(5)  |
| W(18)-O(54)-W(7)  | 150.5(6) | O(34)-W(17)-O(17)    | 162.1(4) |
| W(13)-O(56)-W(4)  | 124.2(6) | O(10)-W(17)-O(17)    | 89.1(5)  |
| W(18)-O(57)-W(4)  | 149.0(6) | O(11)-W(17)-O(3)     | 172.9(5) |
| P(2)-O(59)-W(1)   | 129.1(6) | O(12)-W(17)-O(3)     | 83.8(4)  |
| P(2)-O(59)-W(7)   | 126.6(6) | O(34)-W(17)-O(3)     | 82.4(4)  |
| W(1)-O(59)-W(7)   | 91.7(4)  | O(10)-W(17)-O(3)     | 73.5(4)  |

|                     |          |                      |           |
|---------------------|----------|----------------------|-----------|
| W(14)-O(62)-W(13)   | 151.5(6) | O(17)-W(17)-O(3)     | 80.5(4)   |
| W(16)#3-O(66)-Cu(3) | 145.2(7) | O(53)-W(18)-O(57)    | 101.2(6)  |
| O(5)-P(1)-O(3)      | 112.7(6) | O(53)-W(18)-O(54)    | 103.3(5)  |
| O(5)-P(1)-O(6)      | 112.1(6) | O(57)-W(18)-O(54)    | 87.1(5)   |
| O(3)-P(1)-O(6)      | 111.5(6) | O(53)-W(18)-O(50)    | 101.5(5)  |
| O(5)-P(1)-O(9)      | 106.4(6) | O(57)-W(18)-O(50)    | 89.0(5)   |
| O(3)-P(1)-O(9)      | 107.7(6) | O(54)-W(18)-O(50)    | 155.2(4)  |
| O(6)-P(1)-O(9)      | 106.0(5) | O(53)-W(18)-O(52)    | 100.7(6)  |
| O(36)-P(2)-O(38)    | 111.4(6) | O(57)-W(18)-O(52)    | 158.1(4)  |
| O(36)-P(2)-O(59)    | 112.2(6) | O(54)-W(18)-O(52)    | 88.7(5)   |
| O(38)-P(2)-O(59)    | 113.1(6) | O(50)-W(18)-O(52)    | 85.8(5)   |
| O(36)-P(2)-O(37)    | 106.3(6) | O(53)-W(18)-O(37)    | 170.9(5)  |
| O(38)-P(2)-O(37)    | 106.4(6) | O(57)-W(18)-O(37)    | 84.8(4)   |
| O(59)-P(2)-O(37)    | 106.9(5) | O(54)-W(18)-O(37)    | 83.7(4)   |
| N(3)-Cu(1)-N(3)#4   | 180.0    | O(50)-W(18)-O(37)    | 71.5(4)   |
| N(3)-Cu(1)-N(1)#4   | 90.0(6)  | O(52)-W(18)-O(37)    | 73.3(4)   |
| N(3)#4-Cu(1)-N(1)#4 | 90.0(6)  | C(103)-C(101)-C(106) | 120.0     |
| N(3)-Cu(1)-N(1)     | 90.0(6)  | C(101)-C(103)-C(105) | 120.0     |
| N(3)#4-Cu(1)-N(1)   | 90.0(6)  | F(8)-C(105)-C(102)   | 112(3)    |
| N(1)#4-Cu(1)-N(1)   | 180.0    | F(8)-C(105)-C(103)   | 128(3)    |
| N(9)-Cu(2)-N(14)    | 89.0(6)  | C(102)-C(105)-C(103) | 120.0     |
| N(9)-Cu(2)-N(6)     | 88.1(6)  | C(105)-C(102)-C(104) | 120.0     |
| N(14)-Cu(2)-N(6)    | 177.0(6) | C(106)-C(104)-C(102) | 120.0     |
| N(9)-Cu(2)-N(7)     | 175.9(6) | C(106)-C(104)-F(9)   | 115(2)    |
| N(14)-Cu(2)-N(7)    | 92.3(6)  | C(102)-C(104)-F(9)   | 125(2)    |
| N(6)-Cu(2)-N(7)     | 90.6(6)  | C(104)-C(106)-C(101) | 120.0     |
| N(9)-Cu(2)-O(103)   | 91.7(7)  | C(104)-C(106)-C(74)  | 120.1(19) |
| N(14)-Cu(2)-O(103)  | 84.7(8)  | C(101)-C(106)-C(74)  | 119.6(19) |
| N(6)-Cu(2)-O(103)   | 96.2(8)  | O(100)-C(7)-C(111)   | 107(2)    |
| N(7)-Cu(2)-O(103)   | 84.5(8)  | O(100)-C(7)-C(118)   | 112.2(17) |
| N(9)-Cu(2)-O(22)    | 98.8(5)  | C(111)-C(7)-C(118)   | 109.3(18) |
| N(14)-Cu(2)-O(22)   | 92.3(5)  | O(100)-C(7)-C(120)   | 105.2(19) |
| N(6)-Cu(2)-O(22)    | 87.3(5)  | C(111)-C(7)-C(120)   | 118(2)    |
| N(7)-Cu(2)-O(22)    | 85.0(5)  | C(118)-C(7)-C(120)   | 105.0(19) |
| O(103)-Cu(2)-O(22)  | 169.0(7) | N(30)-C(118)-C(7)    | 109.7(17) |
| N(17)-Cu(3)-N(20)   | 93.3(7)  | N(101)-N(100)-C(119) | 105(3)    |
| N(17)-Cu(3)-N(19)   | 91.9(7)  | N(20)-C(119)-N(100)  | 110(3)    |
| N(20)-Cu(3)-N(19)   | 171.0(6) | N(101)#6-C(120)-C(7) | 108(2)    |

|                    |          |                        |        |
|--------------------|----------|------------------------|--------|
| N(17)-Cu(3)-N(18)  | 177.4(6) | N(101)-C(121)-N(20)    | 103(2) |
| N(20)-Cu(3)-N(18)  | 88.6(7)  | N(100)-N(101)-C(121)   | 115(3) |
| N(19)-Cu(3)-N(18)  | 86.4(7)  | N(100)-N(101)-C(120)#7 | 121(3) |
| N(17)-Cu(3)-O(66)  | 88.7(5)  | C(121)-N(101)-C(120)#7 | 124(2) |
| N(20)-Cu(3)-O(66)  | 85.9(6)  | C(116)-C(111)-C(114)   | 120.0  |
| N(19)-Cu(3)-O(66)  | 101.5(5) | C(116)-C(111)-C(7)     | 110(2) |
| N(18)-Cu(3)-O(66)  | 89.7(5)  | C(114)-C(111)-C(7)     | 130(2) |
| O(16)-Cu(4)-O(102) | 80.9(5)  | C(111)-C(116)-C(115)   | 120.0  |
| O(16)-Cu(4)-N(11)  | 92.8(6)  | C(111)-C(116)-F(12)    | 131(3) |
| O(102)-Cu(4)-N(11) | 173.6(6) | C(115)-C(116)-F(12)    | 109(3) |
| O(16)-Cu(4)-O(58)  | 172.9(6) | C(113)-C(115)-C(116)   | 120.0  |
| O(102)-Cu(4)-O(58) | 93.1(5)  | F(11)-C(113)-C(112)    | 125(2) |
| N(11)-Cu(4)-O(58)  | 93.3(6)  | F(11)-C(113)-C(115)    | 115(2) |
| O(16)-Cu(4)-Cu(5)  | 39.9(3)  | C(112)-C(113)-C(115)   | 120.0  |
| O(102)-Cu(4)-Cu(5) | 41.0(4)  | C(113)-C(112)-C(114)   | 120.0  |
| N(11)-Cu(4)-Cu(5)  | 132.7(5) | C(112)-C(114)-C(111)   | 120.0  |
| O(58)-Cu(4)-Cu(5)  | 133.9(4) | F(13B)-F(13A)-C(17)    | 64(3)  |
| O(16)-Cu(5)-N(26)  | 91.4(7)  | F(13A)-F(13B)-C(17)    | 62(3)  |

Symmetry transformations used to generate equivalent atoms: #1  $-x+1/2, y-1/2, -z+1/2$ ; #2  $-x+1/2, y+1/2, -z+1/2$ ; #3  $x-1, y, z$ ; #4  $-x+2, -y+2, -z$ ; #5  $x+1, y, z$ ; #6  $-x+3/2, y+1/2, -z+1/2$ ; #7  $-x+3/2, y-1/2, -z+1/2$
